# Supplementary material
Source: PubMed Central journal article supplement (PMC7212653)
Supplement: supp_RA120.013402_159410_1_supp_499375_q7s7dl.pdf [file supp_RA120.013402_159410_1_supp_499375_q7s7dl.pdf]

Tracking isotopically labeled oxidants using boronate-based redox probes

**Natalia Rios<sup>1,2</sup>, Rafael Radi<sup>1,2</sup>, Balaraman Kalyanaraman<sup>3</sup>, and Jacek Zielonka<sup>3\*</sup>**

From the <sup>1</sup>Departamento de Bioquímica, <sup>2</sup>Centro de Investigaciones Biomédicas (CEINBIO), Facultad de Medicina, Universidad de la República, Montevideo, Uruguay; <sup>3</sup>Department of Biophysics, Medical College of Wisconsin, Milwaukee, WI 53226, USA

## **SUPPORTING INFORMATION**

**Supplementary Figure S-1**..... S-2

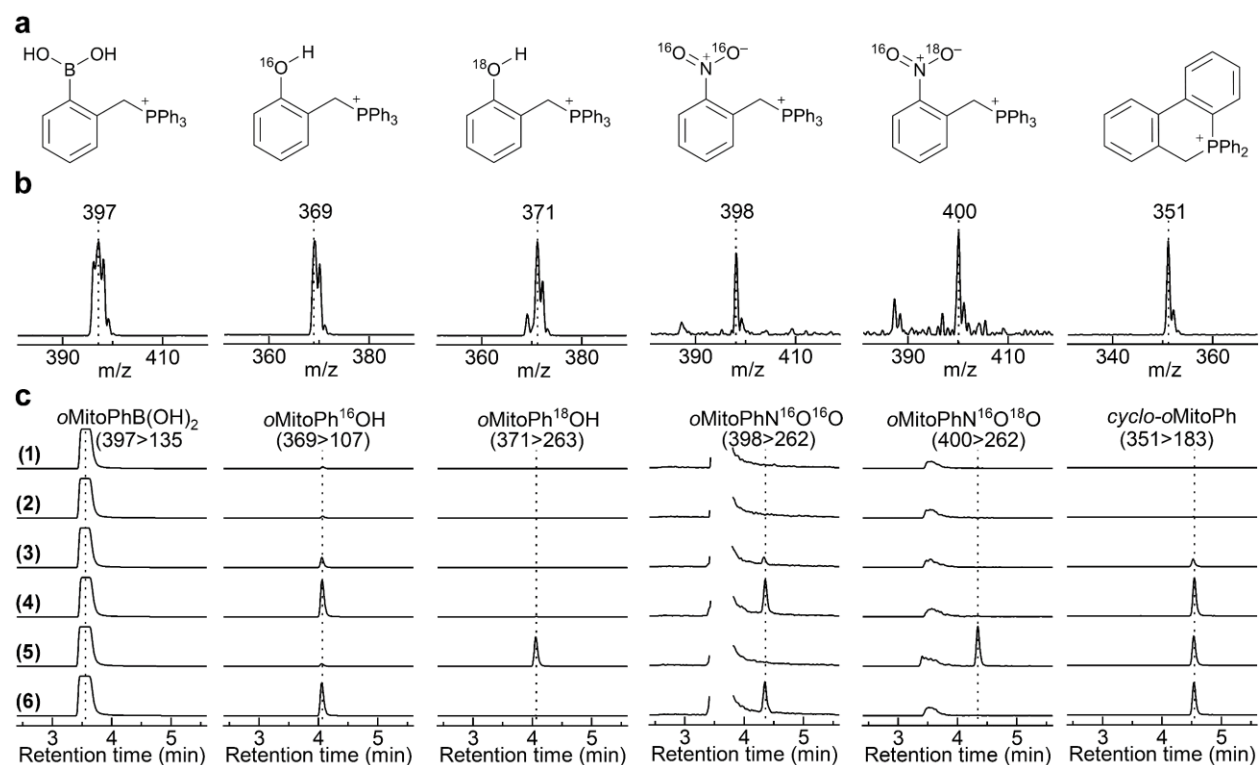

**Supplementary Figure S-1. Generation of peroxyntirite and incorporation of oxygen atom into the phenolic and nitrated products during oxidation of *o*MitoPhB(OH)<sub>2</sub> by ONOO<sup>-</sup>.** (a) Chemical structures of the products; (b) online mass spectra of the detected products; and (c) LC-MS/MS traces of the probe and products detected. LC-MS/MS analyses were performed after incubation (30 min) of *o*MitoPhB(OH)<sub>2</sub> (20 μM) alone (1), or with *in situ*-generated fluxes of O<sub>2</sub><sup>-</sup> (2, 0.2 μM O<sub>2</sub><sup>-</sup>/min, formed during XO-catalyzed oxidation of HX in the solution saturated with oxygen), <sup>•</sup>NO (3, 0.2 μM/min, formed from thermal decomposition of spermine-NONOate), ON<sup>16</sup>O<sup>16</sup>O<sup>-</sup> (4, 6), or ON<sup>18</sup>O<sup>18</sup>O<sup>-</sup> (5). ON<sup>16</sup>O<sup>16</sup>O<sup>-</sup> and ON<sup>18</sup>O<sup>18</sup>O<sup>-</sup> were produced by co-generated fluxes of <sup>•</sup>NO and <sup>16</sup>O<sub>2</sub><sup>-</sup> or <sup>18</sup>O<sub>2</sub><sup>-</sup>. All samples contained phosphate buffer (25 mM, pH = 7.4), dtpa (0.1 mM), and catalase (5 kU/mL) in H<sub>2</sub><sup>16</sup>O (samples 1-5) or in H<sub>2</sub><sup>18</sup>O (sample 6), purged with <sup>16</sup>O<sub>2</sub> (samples 1-4, 6) or <sup>18</sup>O<sub>2</sub> (sample 5).
